1 **Ancient genomic variation underlies recent and repeated ecological adaptation**

2

3

4

Thomas C. Nelson<sup>1</sup> and William A. Cresko<sup>1\*</sup>

5

6

<sup>1</sup>Institute of Ecology and Evolution, University of Oregon, Eugene, OR

7

\*To whom correspondence should be addressed: [wresko@uoregon.edu](mailto:wresko@uoregon.edu)

8

9 **Adaptation in the wild often involves the use of standing genetic variation (SGV),**  
10 **allowing rapid responses to selection on ecological timescales. Despite**  
11 **increasing documentation of evolutionarily important SGV in natural populations,**  
12 **we still know little about how the genetic and genomic structure and molecular**  
13 **evolutionary history of SGV relate to adaptation. Here, we address this knowledge**  
14 **gap using the threespine stickleback fish (*Gasterosteus aculeatus*) as a model.**  
15 **We demonstrate that adaptive genetic variation is structured genome-wide into**  
16 **distinct marine and freshwater haplogroups. This divergent variation averages six**  
17 **million years old, nearly twice the genome-wide average, but has been evolving**  
18 **over the 15-million-year history of the species. Divergent marine and freshwater**  
19 **genomes maintain regions of ancient ancestry that include multiple chromosomal**  
20 **inversions and extensive linked variation. These discoveries about ancient SGV**  
21 **demonstrate the intertwined nature of selection on ecological timescales and**  
22 **genome evolution over geological timescales.**

23       The mode and tempo of adaptive evolution depend on the sources of genetic  
24 variation affecting fitness<sup>1,2</sup>. While new mutation is ultimately the source of all genetic  
25 variation, recent studies of adaptation in the wild document adaptive genetic variation  
26 that was either segregating in the ancestral population as standing genetic variation  
27 (SGV)<sup>3-5</sup> or introgressed from a separate population or species<sup>6,7</sup>. The use of SGV  
28 appears particularly important when dramatic responses to selection occur on  
29 ecological timescales, in dozens of generations or fewer<sup>3</sup>. When environments change  
30 rapidly, SGV can propel rapid evolution in ecologically relevant traits even in  
31 populations of long-lived organisms like Darwin's finches<sup>8</sup>, monkeyflowers<sup>9</sup>, and  
32 threespine stickleback fish<sup>10</sup>.

33       Existing genetic variants have evolutionary histories that are often unknown but  
34 that may have significant impacts on subsequent adaptation<sup>9,11</sup>. The abundance,  
35 genomic distribution, and fitness effects<sup>10-14</sup> of SGV are themselves products of  
36 evolution, and their unknown history raises fascinating questions for the genetics of  
37 adaptation in the wild. When did adaptive variants originally arise? How are they  
38 structured, across both geography and the genome? Which evolutionary forces shaped

39 their distribution? And how does this evolutionary history of SGV potentially channel  
40 future evolutionary change?

41 Answers to these questions are critical for our understanding of the importance of  
42 SGV in nature and our ability to predict the paths available to adaptation on ecological  
43 timescales<sup>9</sup>. Biologists are beginning to probe evolutionary histories of SGV using  
44 genome-wide sequence variation across multiple individuals in numerous populations<sup>15</sup>,  
45 but this level of inference has been unavailable for most natural systems because of  
46 methodological limitations that remove phase information (e.g. pool-seq<sup>16</sup>) or produce  
47 very short reads (e.g. RAD-seq<sup>17</sup>). Here, we investigate the structure and evolutionary  
48 history of divergent SGV by implementing a novel haplotyping method based on  
49 restriction site-associated DNA sequencing (RAD-seq). This approach creates nearly  
50 1kb haplotypes at thousands of densely sampled loci, allowing us to accurately  
51 measure sequence variation and estimate divergence times across the genome.

52 SGV is likely critical to adaptation in this species. Marine stickleback have  
53 repeatedly colonized freshwater lakes and streams<sup>18,19</sup>, and adaptive divergence in  
54 isolated freshwater habitats is highly parallel at the phenotypic<sup>20,21</sup> and genomic  
55 levels<sup>19,22</sup> (but see Stuart et al.<sup>23</sup>). In addition, analyses of haplotype variation at the  
56 genes *eda*<sup>10,24</sup> and *atp1a1*<sup>24</sup> present two clear results: separate freshwater populations  
57 share common 'freshwater' haplotypes that are identical-by-descent (IBD), and  
58 sequence divergence between the major marine and freshwater haplogroups suggests  
59 their ancient origins, perhaps over two million years ago in the case of *eda*<sup>10</sup>. While  
60 intriguing, it is not clear whether the deep evolutionary histories of these loci are outliers  
61 or representative of more widespread ancient history across the genome. To address  
62 this fundamental question we utilize the new haplotype RAD-seq approach to assay  
63 genome-wide variation associated with adaptive divergence in two young freshwater  
64 ponds, which formed during the end- the end-Pleistocene glacial retreat (c. 12,000  
65 years ago<sup>21,25</sup>; Fig. 1). Our results demonstrate a suite of adaptive variation structured  
66 into distinct marine and freshwater haplotypes that evolved over millions of years.

67

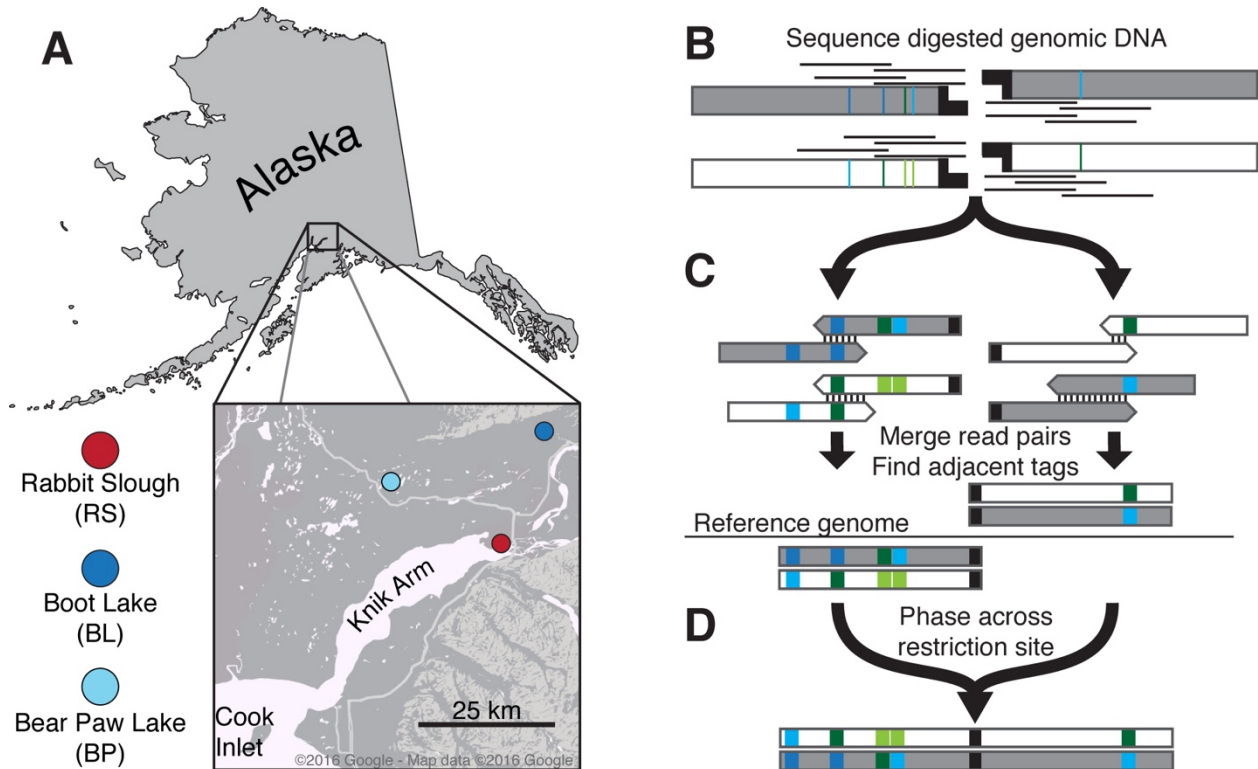

**Figure 1. Stickleback sampling and RAD sequencing to measure haplotype variation.** A) Threespine stickleback sampling locations in this study. Colors represent habitat type: red: marine; blue: freshwater. B-D) We modified the original RAD-seq protocol to generate local haplotypes. Colored bars represent polymorphic sites. For a detailed description of haplotype construction, see *Methods*. B) Overlapping paired-end reads are anchored to *PstI* restriction sites. C) Paired reads mapping to each halfsite are merged into contigs. Contigs mapping to the same restriction site are identified by alignment to the reference genome. D) Sequences from each half of a restriction site are phased to generate a single RAD locus.

## 68 RESULTS AND DISCUSSION

69 Parallel adaptation to freshwater environments has been a major theme of  
 70 stickleback evolutionary history<sup>26</sup>. Stereotypical morphological changes (e.g. bony  
 71 armor<sup>20</sup> and craniofacial structures<sup>27</sup>) presumably reflect adaptation to similar selective  
 72 regimes<sup>28,29</sup> and are accompanied by parallel genomic divergence<sup>19,22</sup>, which involves  
 73 large regions spanning many megabases<sup>24,30</sup>, including multiple chromosomal  
 74 inversions<sup>19</sup>. The leading hypothesis for the genetics of parallel divergence in  
 75 stickleback posits that distinct freshwater-adaptive haplotypes that are identical-by-  
 76 descent (IBD) are shared among fresh water populations due to historical gene flow  
 77 between marine and freshwater populations<sup>30</sup>. To test for the presence of these  
 78 haplotypes directly, we characterized the genomic architecture and evolutionary history

79 of SGV by modifying the RAD-seq protocol<sup>31</sup> to generate phased haplotypes similar in  
80 length to Sanger sequencing reads, each anchored to tens of thousands of *Pst*I  
81 restriction sites spread across the genome (Fig. 1.B-D). We sampled five fish (10  
82 haploid genomes) each from Boot Lake (BL) and Rabbit Slough (RS), and four fish (8  
83 genomes) from Bear Paw Lake (BP). After stringent data filtering (see Methods), this  
84 resulted in a dataset of 57,992 RAD loci (locus = two tags representing one cut site)  
85 with 694 potential variable sites per locus and a median of seven segregating sites per  
86 locus (range: 2-155, Suppl. Fig. 1, Suppl. Table 1). We then used these phased  
87 haplotypes to estimate genealogies at each RAD locus. By including haplotypes from all  
88 three populations in these genealogical analyses, we were able to jointly calculate  
89 population genetic statistics ( $F_{ST}$ ,  $\pi$ ,  $d_{XY}$ ), estimate the degree of lineage sorting within  
90 populations, and identify patterns of IBD among populations.

91 We find that indeed, parallel population genomic divergence in each freshwater  
92 site consistently involved haplotypes that were IBD among both freshwater populations  
93 (Fig. 2). Background  $F_{ST}$  between populations ranged from 0.139-0.226, with  
94 divergence between the freshwater populations BL and BP being highest ( $F_{ST(RS-BL)} =$   
95  $0.139$ ,  $F_{ST(RS-BP)} = 0.194$ ,  $F_{ST(BL-BP)} = 0.226$ ; two-sided Mann-Whitney test for all pairwise  
96 comparisons:  $p \leq 1 \times 10^{-10}$ ). The degree and genomic distribution of pairwise  $F_{ST}$  between  
97 the BL, BP, and RS populations were similar to those previously reported<sup>22</sup>, including  
98 marine-freshwater  $F_{ST}$  outlier regions on chromosome 4 over a broad span in which the  
99 *eda* gene is embedded (orange triangle in Fig. 2A) and three regions now known to be  
100 associated with chromosomal inversions on chromosomes 1, 11, and 21 (yellow bars in  
101 Fig. 2; hereafter referred to as *inv1*, *inv11*, and *inv21*). The gene *atp1a1* (green triangle  
102 in Fig. 2A) is contained within *inv1*. As expected, we found distinct haplogroups  
103 associated with marine and freshwater habitats at both *eda* and *atp1a1* (Fig. 3, insets).

104 Strikingly, this finding of habitat specific haplogroups was not at all unique to  
105 these well studied genes or chromosomal inversions. The two isolated freshwater  
106 populations shared IBD haplotypes within all common marine-freshwater  $F_{ST}$  peaks  
107 even though IBD was rare elsewhere (Fig. 2B). Furthermore, we observed a separate  
108 clade of haplotypes representing the marine RS population at the majority (1129 of

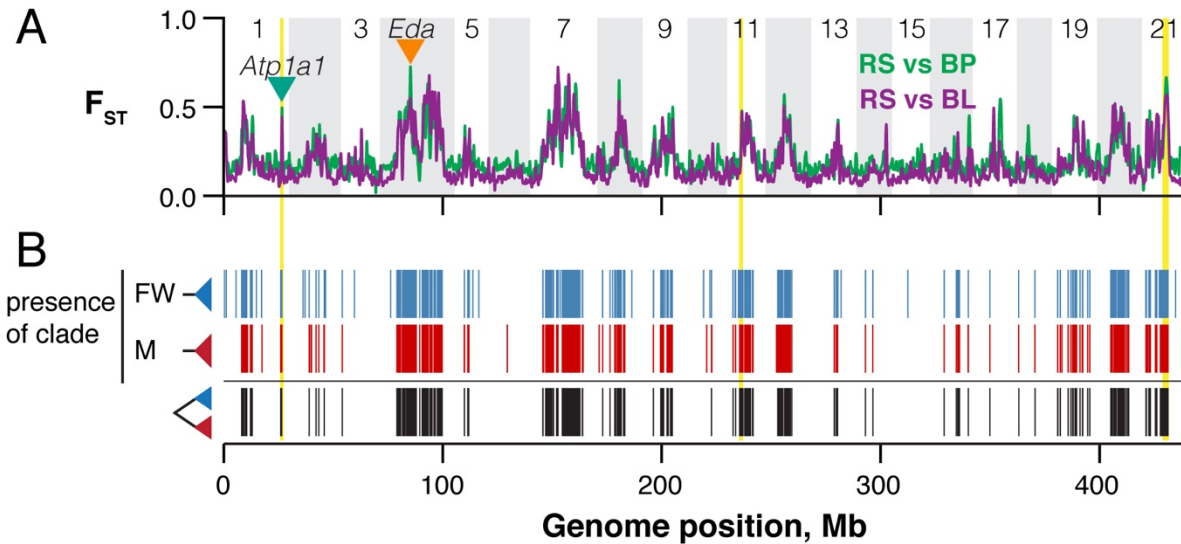

**Figure 2. The genealogical structure of parallel genomic divergence.** A) Genome-wide  $F_{ST}$  for both marine-freshwater comparisons was kernel-smoothed using a normally distributed kernel with a window size of 500 kb. Inverted triangles indicate the locations of two genes known to show extensive marine-freshwater haplotype divergence, *Eda* and *Atp1a1*. Three chromosomal inversions are highlighted in yellow. B) Lineage sorting patterns were identified from maximum clade credibility trees for each RAD locus. Blue bars: haplotypes from both freshwater populations form a single monophyletic group; red: haplotypes from the marine population form a monophyletic group; black: A RAD locus is structured into reciprocally monophyletic marine and freshwater haplogroups.

109 2172, 52%) of RAD loci showing freshwater IBD. The result was a genome-wide pattern  
 110 of reciprocal monophyly between marine and freshwater haplotypes. Notably, this is the  
 111 same genealogical structure previously reported at *eda*<sup>10,24</sup> and *atp1a1*<sup>24</sup>,  
 112 demonstrating that these loci are but a small part of a genome-wide suite of genetic  
 113 variation sharing similar habitat-specific evolutionary histories, and the previous  
 114 documentation of their genealogies was a harbinger of a much more extensive pattern  
 115 across the genome revealed here. Hereafter, we refer collectively to this class of RAD  
 116 loci as ‘divergent loci’.

117 Because the genealogical structure of divergence across the genome mirrors  
 118 that at *eda* and *atp1a1*, we asked whether levels of sequence variation and divergence  
 119 also showed consistent genomic patterns. At all RAD loci we therefore calculated  $\pi$   
 120 within each population, as well as in the combined freshwater populations, and  $d_{XY}$   
 121 between marine and freshwater habitat types. Genome-wide diversity was similar  
 122 across populations and habitat types (mean  $\pi_{RS} = 0.0032$ ,  $\pi_{BL} = 0.0034$ ,  $\pi_{BP} = 0.0026$ ,  
 123  $\pi_{FW} = 0.0038$ ) and comparable to previous estimates<sup>22</sup>. Likewise, genome-wide  $d_{XY}$

124 among habitat types was modest (0.0049)  
125 when compared to  $\pi$  across all  
126 populations ( $\pi = 0.0042$ , two-sided Mann-  
127 Whitney test:  $p \leq 1 \times 10^{-10}$ ). Among  
128 divergent loci, however, we observed  
129 reductions in diversity in both habitats  
130 (mean  $\pi_{\text{RS-divergent}} = 0.0012$ ,  $\pi_{\text{RS-divergent}} =$   
131  $0.0016$ , two-sided permutation test:  $p \leq$   
132  $1 \times 10^{-4}$ , Fig. 3, Suppl. Fig. 2), indicating  
133 natural selection in both habitats.  
134 Sequence divergence associated with  
135 reciprocal monophyly was striking,  
136 however, averaging nearly three times the  
137 genome-wide mean (mean  $d_{\text{XY-divergent}} =$   
138  $0.0124$ ). This divergence ranged more  
139 than an order of magnitude (0.0013–  
140  $0.0442$ ), from substantially lower than the  
141 genome-wide average to ten times greater  
142 than the average. These findings indicate  
143 that much of the genetic variation  
144 underlying adaptive divergence was not  
145 just standing and structured by habitat,  
146 but has been segregating and  
147 accumulating for millennia.

148 These data clearly support the  
149 hypothesis of Schluter and Conte<sup>30</sup> of  
150 ancient haplotypes ‘transported’ among  
151 freshwater populations. Much of the divergence we observed was ancient in origin, with  
152 levels of sequence divergence at some RAD loci exceeding that observed at *eda* (Fig.  
153 3, gold line) and suggestive of divergence times of at least two million years ago<sup>10</sup>. Our

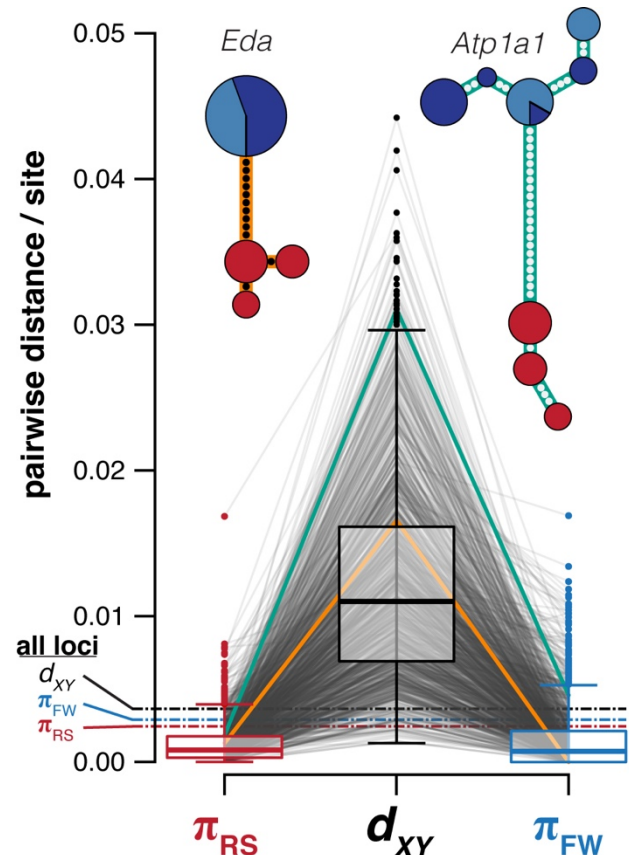

**Figure 3. Extensive sequence divergence between marine and freshwater haplogroups accompanies reciprocal monophyly.** For each reciprocally monophyletic RAD locus, we calculated sequence variation ( $\pi$ ) within and sequence divergence between habitat types ( $d_{\text{XY}}$ ). Each RAD locus is shown as a pair of lines connecting estimates of  $\pi$  and  $d_{\text{XY}}$ . Boxplots show distributions across all reciprocally monophyletic RAD loci: Boxes are upper and lower quartiles, including the median; whiskers extend to 1.5x interquartile range. Dashed lines are the genome-wide medians. Single RAD loci from within the transcribed regions of *Eda* and *Atp1a1* are shown as gold and green lines, respectively, and presented as haplotype networks. Dots represent mutational steps. Circle sizes indicate the number of haplotypes and colors indicate population of origin as in Figure 1. Each network = 29 haplotypes.

154 observation that sequence variation was consistently reduced in both habitat types  
155 emphasizes that alternative haplotypes at these loci are likely selected for in the marine  
156 population as well as the freshwater. These alternative fitness optima — driven by  
157 different ecologies — provide a favorable landscape for the maintenance of  
158 variation<sup>32,33</sup>, but also lead to a more potent barrier to gene flow among freshwater  
159 populations if there are fitness consequences in the marine habitat for stickleback  
160 carrying freshwater-adaptive variation. Conditional fitness effects through genetic  
161 interactions (e.g., dominance<sup>34</sup> or epistasis<sup>35</sup>) and genotype-by-habitat interactions<sup>36</sup>  
162 could potentially extend the residence time of freshwater haplotypes in the marine  
163 habitat. Future work should consider the phenotypic effects of divergently adaptive  
164 variation in different external environments<sup>36,37</sup>.

165         A steady accumulation of divergently adaptive variation between marine and  
166 freshwater stickleback genomes may also have been critical to the rapid divergence in  
167 the young pond populations we study here. We found reciprocal monophyly associated  
168 with a spectrum of sequence divergence, including a substantial fraction of divergent  
169 loci (11.0%, 124/1129) with  $d_{XY}$  below the genome-wide average. Thus, ongoing  
170 marine-freshwater ecological divergence has yielded continuing marine-freshwater  
171 genomic divergence. Moreover, while this younger variation is shared between the  
172 freshwater populations in this study, and localizes to genomic regions of divergence  
173 shared globally<sup>19</sup>, some adaptive variants may be distributed only locally (e.g. to  
174 southern Alaska or the eastern Pacific basin). In addition to the globally distributed suite  
175 of variation, there may also exist a substantial amount of regional variation contributing  
176 to stickleback genomic and phenotypic diversity.

177         Sequence divergence provides an important relative evolutionary timescale.  
178 However, to more directly compare the timescales of ecological adaptation and genomic  
179 evolution, we translated patterns of sequence variation into the time to the most recent  
180 common ancestor ( $T_{MRCA}$ ) of allelic variation, in years. To do so, we performed a *de*  
181 *novo* genome assembly of the ninespine stickleback (*Pungitius pungitius*), a member of  
182 the Gasterosteidae that diverged from the threespine stickleback lineage approximately  
183 15 million years ago<sup>38</sup> (Fig. 4A, Suppl. Table 2). We then aligned our RAD dataset to



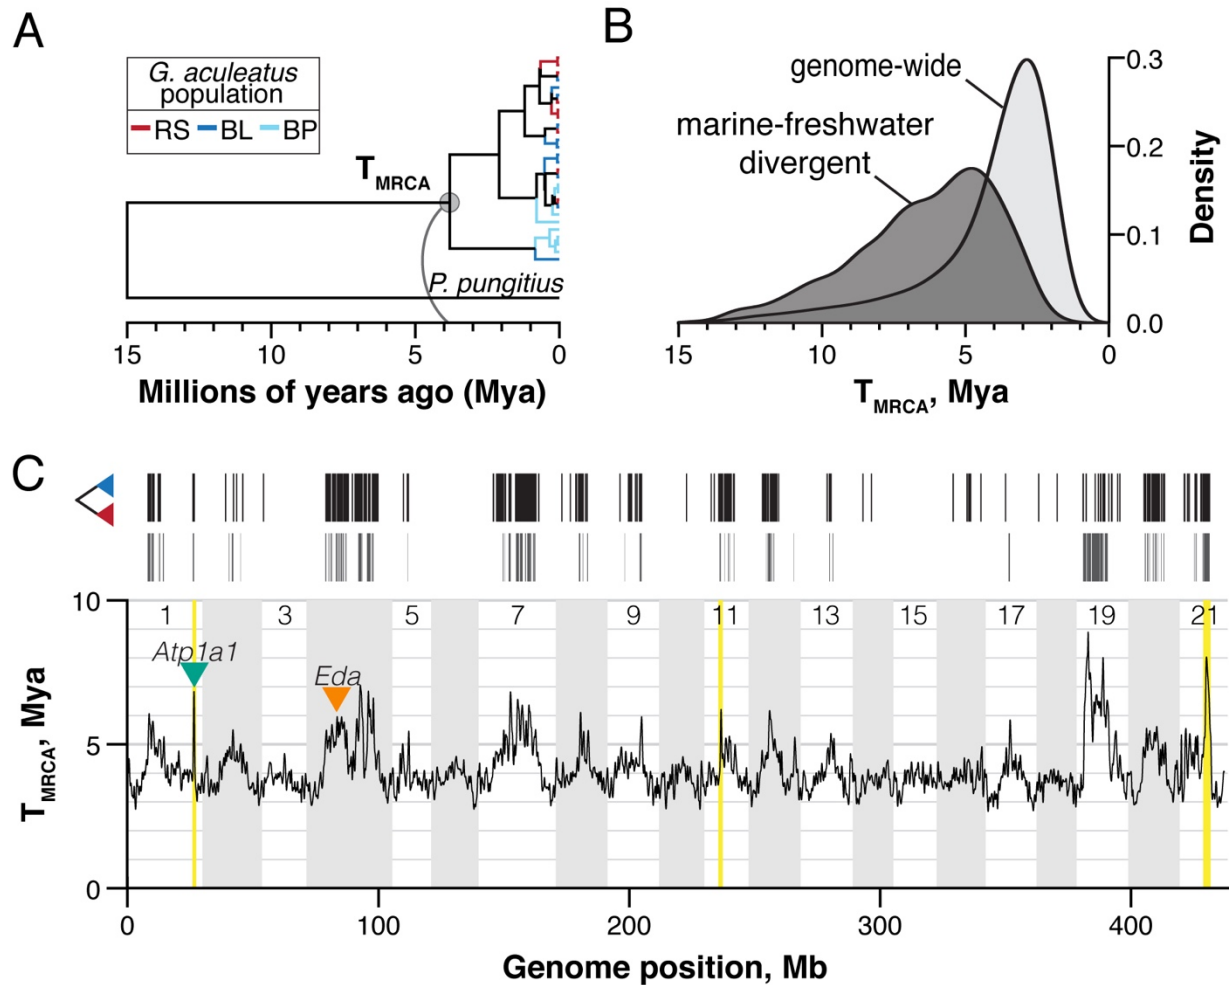

**Figure 4. Marine-freshwater divergence has evolved over millions of years, affecting large genomic regions.** We performed Bayesian estimation of the time to the most recent common ancestor ( $T_{MRCA}$ ) of alleles at threespine stickleback RAD loci. We calibrated coalescence times within threespine stickleback by including a *de novo* genome assembly from the ninespine stickleback (*Pungitius pungitius*) and setting threespine-ninespine divergence at 15 million years ago. A) Maximum clade credibility RAD gene tree representative of the genome-wide average  $T_{MRCA}$ . Branches within threespine are colored by population of origin. B) Kernel-smoothed densities of  $T_{MRCA}$  distributions for all RAD loci containing a monophyletic group of threespine stickleback alleles (light gray) and those structured into reciprocally monophyletic marine and freshwater haplogroups. C) The genomic distribution of reciprocally monophyletic RAD loci (black, as in Figure 2) is associated with increased  $T_{MRCA}$  at a genomic scale.  $T_{MRCA}$  outlier windows (those exceeding 99.9% of permuted genomic windows) are shown as gray bars. Genome-wide  $T_{MRCA}$  was kernel-smoothed using a normally distributed kernel with a window size of 500 kb. Inverted triangles indicate the locations of *Eda* and *Atp1a1*. Three chromosomal inversions are highlighted in yellow.

184 this assembly and estimated gene trees for each alignment with BEAST<sup>39</sup>, setting  
 185 divergence to the ninespine stickleback at 15 MYA (see Methods).

186 We find that the divergence of key marine and freshwater haplotypes has been  
 187 ongoing for millions of years and extends back to the split with the ninespine stickleback

188 lineage (Fig. 4B). Genome-wide variation averaged 4.1 MY old, and  $T_{MRCA}$  for the vast  
189 majority of RAD loci was under 5 MY old. In contrast, divergent loci averaged 6.4 MY  
190 old and, amazingly, the most ancient 10% (118 of 1129 loci) are estimated at over 10  
191 MY old. This deep genomic divergence not only underscores that the marine-freshwater  
192 transition has been occurring throughout the history of the threespine stickleback  
193 lineage, for which there is evidence in the fossil record going back 10 million years<sup>40</sup>,  
194 but it also demonstrates that at least some of the variation fueling those ancient events  
195 has persisted until the present day. In some genomic regions, then, marine and  
196 freshwater threespine stickleback are as divergent as threespine and ninespine  
197 stickleback, which are classified into separate genera.

198 Adaptive divergence has impacted the history of the stickleback genome as a  
199 whole (Fig. 4C). We identified 32.6 Mb, or 7.5%, of the genome as having elevated  
200  $T_{MRCA}$  (gray boxes in Fig. 4C; two-sided permutation test,  $p \leq 0.001$ ). Outside of the  
201 non-recombining portion of the sex chromosome (chr. 19), the oldest regions of the  
202 stickleback genome were those enriched for divergent loci. Patterns of ancient ancestry  
203 closely mirrored recent divergence in allele frequencies (Fig. 2A) and it appears that  
204 historical and contemporary marine-freshwater divergence has impacted ancestry  
205 across much of the length of some chromosomes. Chromosome 4, for example,  
206 contains at least three broad peaks in  $T_{MRCA}$  and a total of 5.9 Mb identified as genome-  
207 wide outliers (two-sided permutation test,  $p \leq 0.001$ ). This chromosome has been of  
208 particular interest because of its association with a number of phenotypes<sup>20,41</sup>, including  
209 fitness<sup>42</sup>. We found the major-effect armor plate locus *eda* comprised a local peak  
210 (mean  $T_{MRCA} = 6.4$  MYA) nested within a large region of deep ancestry spanning 8.1  
211 Mb. Moreover, at least two other peaks distal to *eda*, centered at 21.4 Mb and 26.6 Mb,  
212 were also several million years older than the genomic average at 6.8 MYA and 7.0  
213 MYA, respectively.

214 Intriguingly, genomic regions of elevated  $T_{MRCA}$  remained outliers even after  
215 removing marine-freshwater relative divergence outliers as measured by  $F_{ST}$  (Suppl.  
216 Fig. 3). We estimated that 7.5% of the genome had increased  $T_{MRCA}$  even though only  
217 1.9% of RAD loci (1129 of 57,992) were classified as divergent. When we removed

218 these loci along with loci with extreme values of marine-freshwater  $F_{ST}$  ( $F_{ST} > 0.5$ ),  
219 many of the regions in which they resided were still  $T_{MRCA}$  outliers. It is possible that the  
220 remainder of this old variation is neutral with respect to fitness. However, we identified  
221 divergence outliers based on only a single axis of divergence: the marine-freshwater  
222 axis. Throughout the entire species range, populations are locally experiencing multiple  
223 axes of divergence, including lake-stream and benthic-limnetic axes<sup>43</sup>, that often shares  
224 a common genomic architecture<sup>44,45</sup>. Our data may indicate underlying similarities in  
225 selection regimes. Alternatively, this co-localized ancient variation may represent the  
226 accumulation of adaptive divergence along multiple axes in the same genomic regions,  
227 whether or not the underlying adaptive variants are the same. Aspects of the genomic  
228 architecture, such as gene density or local recombination rates, may in part govern  
229 where in the genome adaptive divergence can occur<sup>46-48</sup>. Multiple axes of divergence  
230 may therefore act synergistically to maintain genomic variation across the stickleback  
231 metapopulation.

232         Nevertheless, much of the ancient variation we observe may in fact itself be  
233 neutral, having been maintained by close linkage to loci under divergent selection  
234 between the marine and freshwater habitats<sup>32</sup>. Indeed, the broadest peaks of  $T_{MRCA}$  we  
235 observe occur in genomic regions with low rates of recombination<sup>47,49</sup> in other  
236 stickleback populations, which would extend the size of the linked region affected by  
237 divergent selection. On ecological timescales, low recombination rates in stickleback  
238 are thought to promote divergence by making locally adapted genomic regions resistant  
239 to gene flow<sup>47</sup>. Our results potentially extend the inferred impact of recombination rate  
240 variation on genomic variation to timescales that are 1000-fold longer, maintaining both  
241 multimillion-year-old adaptive variation and large stores of linked genetic variation.  
242 Future modeling efforts will be needed to explore the range of population genetic  
243 parameter values (e.g. selection coefficients, migration rates, and recombination rates)  
244 required to produce the extent of divergence we see here.

245         Lastly, our findings demonstrate that known chromosomal inversions maintain  
246 globally distributed, multilocus haplotypes. The three chromosomal inversions (*inv1*,  
247 *inv11*, and *inv21*; yellow bars in Fig. 4C) all showed sharp spikes in  $T_{MRCA}$ . Genomic

248 signatures of these inversions are distributed throughout the species range, including  
249 coastal marine-freshwater population pairs in the Pacific and Atlantic basins<sup>19</sup> and  
250 inland lake-stream pairs in Switzerland.<sup>44</sup> Despite our limited geographic sampling, our  
251 finding that all three of these inversions are over six million years old is further evidence  
252 of single, ancient origins of each, followed by their spread across the species range.  
253 Each inversion contained a high density of divergent RAD loci (*inv1*: 64% of loci  
254 divergent; *inv11*: 60%; *inv21*: 71%) but we also identified regions within these inversions  
255 in which haplotypes from marine or freshwater habitats, or both, were not monophyletic.  
256 *inv1* and *inv11* both contained two regions separated by loci in which neither habitat  
257 type was monophyletic; *inv21*, the largest of the three, contained ten such regions.  
258 Additionally,  $T_{MRC A}$  and  $F_{ST}$  decreased sharply to background levels outside of the  
259 inversions, demonstrating the potential for gene flow and recombination to homogenize  
260 variation in these regions. We interpret this as evidence that these inversions help  
261 maintain linkage disequilibrium among multiple divergently adaptive variants in regions  
262 susceptible to homogenization<sup>11,50</sup>. The presence of these inversions, therefore, further  
263 supports the hypothesis that the recombinational landscape can influence where in the  
264 genome adaptive divergence can occur and emphasizes the degree to which gene flow  
265 among divergently adapted stickleback populations has impacted global genomic  
266 diversity.

267

## 268 CONCLUSIONS

269 Selection operating on two very different timescales — the ecological and the  
270 geological — has shaped genomic patterns of SGV in the threespine stickleback.  
271 Selection on ecological timescales drives phenotypic divergence in decades or millennia  
272 by sorting SGV across geography and throughout the genome<sup>22,44,51,52</sup>. Our findings  
273 show that the persistence of this ecological diversity and local adaptation of stickleback  
274 has set the stage for long-term divergent selection and for the continual accumulation  
275 and maintenance of adaptive variation over millions of years. A number of genetic  
276 variants fueling contemporary, rapid adaptation may even have been present - and  
277 under selection - since before the threespine-ninespine stickleback lineages split. The

278 extent to which ecological adaptation in a single population drew on haplotypes that  
279 have evolved over millions of years and persisted in multiple populations, many of which  
280 are now extinct, underscores the need to understand macroevolutionary patterns when  
281 studying microevolutionary processes, and vice versa.

282

## 283 METHODS

### 284 *Sample collection and library preparation*

285 Wild threespine stickleback were collected from Rabbit Slough (N 61.5595, W  
286 149.2583), Boot Lake (N 61.7167, W 149.1167), and Bear Paw Lake (N 61.6139, W  
287 149.7539). Rabbit Slough is an offshoot of the Knik Arm of Cook Inlet and is known to  
288 be populated by anadromous populations of stickleback that are stereotypically oceanic  
289 in phenotype and genotype<sup>22,53</sup>. Boot Lake and Bear Paw Lake are both shallow lakes  
290 formed during the end-Pleistocene glacial retreat. Fish were collected in the summers of  
291 2009 (Rabbit Slough), 2010 (Bear Paw Lake), and 2014 (Boot Lake) using wire minnow  
292 traps and euthanized *in situ* with Tricaine solution. Euthanized fish were immediately  
293 fixed in 95% ethanol and shipped to the Cresko Laboratory at the University of Oregon  
294 (Eugene, OR, USA). DNA was extracted from fin clips preserved in 95% ethanol using  
295 either Qiagen DNeasy spin column extraction kits or Ampure magnetic beads (Beckman  
296 Coulter, Inc) following manufacturer's instructions. Yields averaged 1-2 µg DNA per  
297 extraction (~30 mg tissue). Treatment of animals followed protocols approved the  
298 University of Oregon Institutional Animal Care and Use Committee (IACUC).

299 We designed our library preparation strategy to identify sufficient sequence  
300 variation for gene tree reconstruction and to simplify downstream sequence processing  
301 and analysis by taking advantage of the phase information captured by paired-end  
302 sequencing. We generated RAD libraries from these samples using the single-digest  
303 sheared RAD protocol from Baird et al. with the following specifications and  
304 adjustments: 1 µg of genomic DNA per fish was digested with the restriction enzyme  
305 *PstI*-HF (New England Biolabs), followed by ligation to P1 Illumina adaptors with 6 bp  
306 inline barcodes. Ligated samples were multiplexed and sheared by sonication in a  
307 Bioruptor (Diagenode). To ensure that most of our paired-end reads would overlap

308 unambiguously and produce longer contiguous sequences, we selected a narrow  
309 fragment size range of 425-475 bp. The remainder of the protocol was per Baird et al.  
310 <sup>31</sup>. All fish were sequenced on an Illumina HiSeq 2500 using paired-end 250 bp  
311 sequencing reads at the University of Oregon's Genomics and Cell Characterization  
312 Core Facility (GC3F).

313

### 314 *Sequence preparation*

315 Raw Illumina sequence reads were demultiplexed, cleaned, and processed  
316 primarily using the Stacks pipeline<sup>54</sup>. Paired-end reads were demultiplexed with  
317 **process\_shortreads** and cleaned using **process\_radtags** using default criteria  
318 (throughout this document, names of scripts, programs, functions, and command-line  
319 arguments will appear in **fixed-width font**). Overlapping read pairs were then  
320 merged with **fastq-join**<sup>55</sup> (Fig. S1). Pairs that failed to merge were removed from  
321 further analysis. In order to retain the majority of the sequence data for analysis in  
322 Stacks and still maintain adequate contig lengths, merged contigs were trimmed to 350  
323 bp and all contigs shorter than 350 bp were discarded. We aligned these contigs to the  
324 stickleback reference genome<sup>19,49</sup> using **bbmap** with the most sensitive alignment  
325 settings (**'vslow=t'**; <http://jgi.doe.gov/data-and-tools/bbtools/>) and used the **pstacks**,  
326 **cstacks**, and **sstacks** components of the Stacks pipeline to create stacks and call  
327 SNPs and haplotypes, create a catalog of RAD tags across individuals, and match tags  
328 across individuals. All data were then passed through the Stacks error correction  
329 module **rxstacks** to prune unlikely haplotypes. We ran the Stacks component program  
330 populations on the final dataset to filter loci genotyped in fewer than four individuals in  
331 each population and to create output files for sequence analysis. We use the naming  
332 conventions of Baird et al.<sup>56</sup>: A "RAD tag" refers to sequence generated from a single  
333 end of a restriction site and the pair of RAD tags sequenced at a restriction site  
334 comprises a "RAD locus" (Figure 2.1).

335 We used the program **phase**<sup>57</sup> to phase pairs of RAD tags originating from the  
336 same restriction site. We coded haplotypes present at each RAD tag, which often

337 contain multiple SNPs, into multiallelic genotypes. This both simplified and reduced  
338 computing time for the phasing process. Custom Python scripts automated this process  
339 and are included as supplementary files. We required that each individual had at least  
340 one sequenced haplotype at each tag for phasing to be attempted. If a sample had  
341 called genotypes at only one tag in the pair, the sample was removed from further  
342 analysis of that locus. The resultant phased haplotypes were used to generate  
343 sequence alignments for import into BEAST.

344 We recovered a total of 236,787 RAD tags after filtering, mapping to 151,813 *Pst*I  
345 restriction sites. At 84,974 restriction sites, we recovered and successfully phased  
346 adjacent RAD tags (169,948 RAD tags) into single RAD loci. We retained these 84,974  
347 RAD loci for our analysis.

348

#### 349 *Ninespine stickleback genome assembly*

350 In order to estimate the  $T_{\text{MRCA}}$  of threespine stickleback RAD alleles, we used the  
351 ninespine stickleback (*Pungitius pungitius*) as an outgroup (Figure 3.1, see Figure 1.2).  
352 RAD sequence analysis, however, relies on the presence of homologous restriction  
353 sites among sampled individuals and results in null alleles when mutations occur within  
354 a restriction site<sup>58</sup>. Because this probability increases with greater evolutionary distance  
355 among sampled sequences, we elected to use RAD-seq to only estimate sequence  
356 variation within the threespine stickleback. We then generated a contig-level *de novo*  
357 ninespine stickleback genome assembly from a single ninespine stickleback individual  
358 from St. Lawrence Island, Alaska (collected by J. Postlethwait) using DISCOVAR *de*  
359 *novo* (<https://software.broadinstitute.org/software/discover>). We used this single  
360 ninespine stickleback haplotype to estimate threespine-ninespine sequence divergence  
361 and time calibrate coalescence times within the threespine stickleback. DISCOVAR *de*  
362 *novo* requires a single shotgun library of paired-end 250-bp sequence reads from short-  
363 insert-length DNA fragments. High molecular weight genomic DNA was extracted from  
364 an ethanol-preserved fin clip by proteinase K digestion followed by DNA extraction with  
365 Ampure magnetic beads. Purified genomic DNA was mechanically sheared by  
366 sonication and size selected to a range of 200-800 bp by gel electrophoresis and

367 extraction. We selected this fragment range to agree with the recommendations for *de*  
368 *novo* assembly using the DISCOVAR *de novo*  
369 (<https://software.broadinstitute.org/software/discovar/blog>). This library was sequenced  
370 on a single lane of an Illumina HiSeq2500 at the University of Oregon's Genomics and  
371 Cell Characterization Core Facility (GC3F: <https://gc3f.uoregon.edu/>). We assembled  
372 the draft ninespine stickleback genome using DISCOVAR *de novo*. Raw sequence read  
373 pairs were first quality filtered and adaptor sequence contamination removed using the  
374 program **process\_shortreads**, which is included in the Stacks analysis pipeline<sup>59</sup>. We  
375 ran the genome assembly on the University of Oregon's Applied Computational  
376 Instrument for Scientific Synthesis (ACISS: <http://aciss-computing.uoregon.edu>).

377

#### 378 *Alignment of RAD tags to the ninespine assembly*

379 We included the single ninespine stickleback haplotype into our sequence  
380 analyses by aligning a single phased threespine stickleback RAD haplotype from each  
381 locus to the ninespine genome assembly. For those that aligned uniquely (59,254 RAD  
382 loci), we used a custom Python script to parse the output BAM file<sup>60</sup> and reconstruct the  
383 ninespine haplotype from the query sequence and alignment fields. The final dataset  
384 consists of 57,992 RAD loci that mapped to the 21 threespine stickleback chromosomes  
385 and aligned uniquely to the ninespine assembly.

386

#### 387 *Lineage sorting and time to the most recent common ancestor*

388 Allelic divergence can occur by multiple modes of lineage sorting during  
389 adaptation. To identify patterns of lineage sorting associated with freshwater  
390 colonization, we analyzed gene tree topologies at all RAD loci using BEAST v. 1.7<sup>39,61</sup>.  
391 We used blanket parameters and priors for BEAST analyses across all RAD loci.  
392 Markov chain Monte Carlo (MCMC) runs of 1,000,000 states were specified, and trees  
393 logged every 100 states. We used a coalescent tree prior and the GTR+ $\Gamma$  substitution  
394 model with four rate categories and uniform priors for all substitution rates. We identified  
395 evidence of lineage sorting by using the program **treeannotator** to select the  
396 maximum clade credibility (MCC) tree for each RAD locus and the



397 **is.monophyletic()** function included in the R package ‘ape’<sup>62</sup>. We determined for  
398 each MCC tree whether tips originating from marine (RS) or freshwater (BL+BP) formed  
399 monophyletic clades.

400 To convert node ages estimated in BEAST into divergence times, in years, we  
401 assumed a 15 million-year divergence time between threespine and ninespine  
402 stickleback at each RAD locus<sup>38</sup>. The  $T_{\text{MRCA}}$  of all alleles in each gene tree was set at  
403 15 Mya at each node age of interest was converted into years relative to the total height  
404 of the tree. Additionally, to use the ninespine stickleback as an outgroup, we required  
405 that threespine stickleback haplotypes at a RAD locus were monophyletic to the  
406 exclusion of the ninespine haplotype. Doing so reduced our analysis to 49,672 RAD loci  
407 for analyses included in Fig. 4 of the main text. RAD loci not showing this pattern of  
408 lineage sorting did not show evidence of a genome-wide correlation with marine-  
409 freshwater divergence and thus do not impact the assertions in the main text. We used  
410 medians of the posterior distributions as point estimates of  $T_{\text{MRCA}}$  for each RAD locus.  
411 Because of the somewhat limited information from any single RAD locus, and because  
412 the facts of the genealogical process mean that the true  $T_{\text{MRCA}}$  at any locus likely differs  
413 from the 15 My estimate<sup>63-65</sup>, we do not rely heavily on  $T_{\text{MRCA}}$  estimates at individual  
414 RAD loci. Rather, we use these estimates to understand patterns of broad patterns of  
415 ancestry throughout the threespine stickleback genome — spatially along chromosomes  
416 and genome-wide patterns.

417 We determined  $T_{\text{MRCA}}$  outlier genomic regions by permuting and kernel  
418 smoothing the genomic distribution of  $T_{\text{MRCA}}$  estimates using the same window sizes as  
419 we present in the main text. Windows where the actual  $T_{\text{MRCA}}$  value exceeded 99.9% of  
420 permuted windows were considered outliers. This method controls for the local density  
421 of RAD loci (poorly sampled regions will have larger confidence bands) and the size of  
422 the windows used.

423

#### 424 *Sequence diversity and haplotype networks*

425 We quantified sequence diversity within and among populations and sequence  
426 divergence between populations using R (R Core Team<sup>66</sup>). We used the R package

427 ‘ape’<sup>62</sup> to compute pairwise distance matrices for all alleles at each RAD locus and  
428 used these matrices to calculate the average pairwise nucleotide distances,  $\pi$ , within  
429 and among populations along with  $d_{XY}$ , the average pairwise distance between two  
430 sequences using only across-population comparisons<sup>67</sup>. We also calculated the  
431 haplotype-based  $F_{ST}$  from Hudson et al.<sup>68</sup> implemented in the R package ‘PopGenome’  
432<sup>69</sup>. We used permutation tests written in R to identify differences in variation within- and  
433 between-habitat type at divergent RAD loci versus the genome-wide distributions.  
434 Mann-Whitney-Wilcoxon tests implemented in R were used to identify variation in  
435 genome-wide diversity among populations and habitat types.

436 We constructed haplotype networks of the RAD loci at *eda* and *atp1a1* using the  
437 infinite sites model with the function `haploNet()` in the R package ‘pegas’<sup>70</sup>. The  
438 *atp1a1* network was constructed from from a RAD locus spanning exon 15 of *atp1a1*  
439 and including portions of introns 14 and 15 at (chr1:21,726,729-21,727,381 [BROAD  
440 S1, v89]; chr1: 26,258,117-26,257,465 [re-scaffolding from Glazer, *et al*<sup>49</sup>]). The *eda*  
441 network spans exon 2 and portions of introns 1 and 3 of *eda* (chr4: 12,808,396-  
442 12,809,030).

443

#### 444 *Code availability*

445 Scripts used to phase RAD-tags, summarize gene trees, calculate population genetic  
446 statistics, and produce figures and statistics presented in paper are available at  
447 <https://github.com/thomnelson/ancient-divergence>. Scripts for processing raw sequence  
448 data are available from the authors upon request.

449

#### 450 DATA AVAILABILITY

451 Raw sequence data supporting these findings are available on the Sequence Read  
452 Archive at PRJNAXXXXXX. The final datasets needed to reproduce the figures and  
453 statistics presented in the paper are available at [https://github.com/thomnelson/ancient-](https://github.com/thomnelson/ancient-divergence)  
454 [divergence](https://github.com/thomnelson/ancient-divergence).

455

#### 456 ACKNOWLEDGEMENTS

457 We thank P. Phillips, M. Streisfeld, J. Postlethwait, K. Sterner for valuable input and  
458 lively discussion throughout this project. We also thank K. Alligood, E. Beck, S.  
459 Bassham, M. Chase, M. Currey, M. Hahn, L. Fishman, C. Small, S. Stankowski, J.  
460 Willis, two anonymous reviewers, and members of the Cresko Lab and the Institute of  
461 Ecology and Evolution for advice and comments on previous versions of this  
462 manuscript. J. Postlethwait graciously donated ninespine stickleback tissue, collected  
463 under award XXXXXXXXX. We acknowledge National Science Foundation awards NSF  
464 DEB 1501423 (WAC and TCN), NSF DEB 0949053 (WAC), and National Institutes of  
465 Health award NIH T32GM007413 (TCN).

466

#### 467 AUTHOR CONTRIBUTIONS

468 TCN and WAC conceived of the project and designed sampling, sequencing, and  
469 analysis. TCN prepared sequencing libraries, wrote software, and performed data  
470 analysis. TCN and WAC wrote the paper.

471

#### 472 COMPETING FINANCIAL INTERESTS

473 The authors declare no competing financial interests.

474

#### 475 LITERATURE CITED

476

- 477 1 Wright, S. The roles of mutation, inbreeding, crossbreeding and selection in  
478 evolution. *Proceedings of the Sixth International Congress on Genetics* **1**, 356-  
479 366 (1932).
- 480 2 Orr, H. A. The genetic theory of adaptation: a brief history. *Nature Reviews*  
481 *Genetics* **6**, 119-127, doi:10.1038/nrg1523 (2005).
- 482 3 Barrett, R. D. H. & Schluter, D. Adaptation from standing genetic variation.  
483 *Trends in Ecology and Evolution* **23**, 38-44, doi:10.1016/j.tree.2007.09.008  
484 (2008).
- 485 4 Domingues, V. S. *et al.* Evidence of adaptation from ancestral variation in young  
486 populations of beach mice. *Evolution* **66**, 3209-3223, doi:10.1111/j.1558-  
487 5646.2012.01669.x (2012).

- 488 5 Schrider, D. R. & Kern, A. D. Soft sweeps are the dominant mode of adaptation  
489 in the human genome. *Molecular Biology and Evolution*,  
490 doi:10.1093/molbev/msx154 (2017).
- 491 6 Huerta-Sánchez, E. *et al.* Altitude adaptation in Tibetans caused by introgression  
492 of Denisovan-like DNA. *Nature* **512**, 194-197, doi:10.1038/nature13408 (2014).
- 493 7 Fontaine, M. C. *et al.* Mosquito genomics. Extensive introgression in a malaria  
494 vector species complex revealed by phylogenomics. *Science* **347**, 1258524,  
495 doi:10.1126/science.1258524 (2015).
- 496 8 Grant, P. R. & Grant, B. R. Unpredictable evolution in a 30-year study of Darwin's  
497 finches. *Science* **296**, 707-711, doi:DOI 10.1126/science.1070315 (2002).
- 498 9 Wright, K. M., *et al.* Indirect Evolution of Hybrid Lethality Due to Linkage with  
499 Selected Locus in *Mimulus guttatus*. *PLoS Biology* **11**,  
500 doi:10.1371/journal.pbio.1001497 (2013).
- 501 10 Colosimo, P. F. *et al.* Widespread parallel evolution in sticklebacks by repeated  
502 fixation of Ectodysplasin alleles. *Science* **307**, 1928-1933,  
503 doi:10.1126/science.1107239 (2005).
- 504 11 Kirkpatrick, M. & Barton, N. Chromosome inversions, local adaptation and  
505 speciation. *Genetics* **173**, 419-434, doi:10.1534/genetics.105.047985 (2006).
- 506 12 Charlesworth, B., Morgan, M. T. & Charlesworth, D. The effect of deleterious  
507 mutations on neutral molecular variation. *Genetics* **134**, 1289-1303 (1993).
- 508 13 Linnen, C. R., *et al.* On the origin and spread of an adaptive allele in deer mice.  
509 *Science* **325**, 1095-1098, doi:10.1126/science.1175826 (2009).
- 510 14 Stankowski, S. & Streisfeld, M. A. Introgressive hybridization facilitates adaptive  
511 divergence in a recent radiation of monkeyflowers. *Proceedings of the Royal*  
512 *Society B: Biological Sciences* **282**, 20151666, doi:10.1098/rspb.2015.1666  
513 (2015).
- 514 15 Pease, J. B., *et al.* Phylogenomics reveals three sources of adaptive variation  
515 during a rapid radiation. *PLoS Biology* **14**, e1002379,  
516 doi:10.1371/journal.pbio.1002379 (2016).
- 517 16 Schlotterer, C., *et al.* Sequencing pools of individuals - mining genome-wide  
518 polymorphism data without big funding. *Nature Reviews Genetics* **15**, 749-763,  
519 doi:10.1038/nrg3803 (2014).
- 520 17 Davey, J. W. *et al.* Genome-wide genetic marker discovery and genotyping using  
521 next-generation sequencing. *Nature Reviews Genetics* **12**, 499-510,  
522 doi:10.1038/nrg3012 (2011).
- 523 18 Bell, M. A. & Foster, S. A. in *The Evolutionary Biology of the Threespine*  
524 *Stickleback* (eds M. A. Bell & S. A. Foster) Ch. 1, 1-27 (Oxford University Press,  
525 1994).
- 526 19 Jones, F. C. *et al.* The genomic basis of adaptive evolution in threespine  
527 sticklebacks. *Nature* **484**, 55-61, doi:10.1038/nature10944 (2012).
- 528 20 Colosimo, P. F. *et al.* The genetic architecture of parallel armor plate reduction in  
529 threespine sticklebacks. *PLoS Biology* **2**, 635-641,  
530 doi:10.1371/journal.pbio.0020109 (2004).

- 531 21 Cresko, W. A. *et al.* Parallel genetic basis for repeated evolution of armor loss in  
532 Alaskan threespine stickleback populations. *Proc Natl Acad Sci U S A* **101**, 6050-  
533 6055, doi:10.1073/pnas.0308479101 (2004).
- 534 22 Hohenlohe, P. A. *et al.* Population genomics of parallel adaptation in threespine  
535 stickleback using sequenced RAD tags. *Plos Genet* **6**, e1000862,  
536 doi:10.1371/journal.pgen.1000862 (2010).
- 537 23 Stuart, Y. E. *et al.* Contrasting effects of environment and genetics generate a  
538 continuum of parallel evolution. *Nature Ecology & Evolution* **1**, 0158,  
539 doi:10.1038/s41559-017-0158 (2017).
- 540 24 Roesti, M., *et al.* The genomic signature of parallel adaptation from shared  
541 genetic variation. *Mol Ecol* **23**, 3944-3956, doi:10.1111/mec.12720 (2014).
- 542 25 Francis, R. C., *et al.* Historical and ecological sources of variation among lake  
543 populations of threespine sticklebacks, *Gasterosteus aculeatus*, near Cook Inlet,  
544 Alaska. *Canadian Journal of Zoology* **64**, 2257-2265 (1986).
- 545 26 Bell, M. A. & Foster, S. A. in *The Evolutionary Biology of the Threespine*  
546 *Stickleback* (eds M. A. Bell & S. A. Foster) Ch. 16, 472-486 (Oxford University  
547 Press, 1994).
- 548 27 Kimmel, C. B. *et al.* Evolution and development of facial bone morphology in  
549 threespine sticklebacks. *Proc Natl Acad Sci U S A* **102**, 5791-5796,  
550 doi:10.1073/pnas.0408533102 (2005).
- 551 28 Reimchen, T. E. in *The Evolutionary Biology of the Threespine Stickleback* (eds  
552 M. A. Bell & S. A. Foster) Ch. 9, 240-276 (Oxford University Press, 1994).
- 553 29 Arnegard, M. E. *et al.* Genetics of ecological divergence during speciation.  
554 *Nature* **511**, 307-311, doi:10.1038/nature13301 (2014).
- 555 30 Schluter, D. & Conte, G. L. Genetics and ecological speciation. *Proc Natl Acad*  
556 *Sci U S A* **106 Suppl 1**, 9955-9962, doi:10.1073/pnas.0901264106 (2009).
- 557 31 Baird, N. A. *et al.* Rapid SNP discovery and genetic mapping using sequenced  
558 RAD markers. *Plos One* **3**, e3376, doi:10.1371/journal.pone.0003376 (2008).
- 559 32 Charlesworth, B., Nordborg, M. & Charlesworth, D. The effects of local selection,  
560 balanced polymorphism and background selection on equilibrium patterns of  
561 genetic diversity in subdivided populations. *Genetics Research* **70**, 155-174,  
562 doi:Doi 10.1017/S0016672397002954 (1997).
- 563 33 Lenormand, T. Gene flow and the limits to natural selection. *Trends Ecol Evol* **17**,  
564 183-189, doi:Doi 10.1016/S0169-5347(02)02497-7 (2002).
- 565 34 Otto, S. P. & Bourguet, D. Balanced polymorphisms and the evolution of  
566 dominance. *American Naturalist* **153**, 561-574, doi:Doi 10.1086/303204 (1999).
- 567 35 Phillips, P. C. Epistasis--the essential role of gene interactions in the structure  
568 and evolution of genetic systems. *Nature Reviews Genetics* **9**, 855-867,  
569 doi:10.1038/nrg2452 (2008).
- 570 36 McGuigan, K., *et al.* Cryptic genetic variation and body size evolution in  
571 threespine stickleback. *Evolution* **65**, 1203-1211, doi:10.1111/j.1558-  
572 5646.2010.01195.x (2011).
- 573 37 McCairns, R. J. S. & Bernatchez, L. Plasticity and heritability of morphological  
574 variation within and between parapatric stickleback demes. *Journal of*

- 575 *Evolutionary Biology* **25**, 1097-1112, doi:10.1111/j.1420-9101.2012.02496.x  
576 (2012).
- 577 38 Aldenhoven, J. T., *et al.* Phylogeography of ninespine sticklebacks (*Pungitius*  
578 *pungitius*) in North America: glacial refugia and the origins of adaptive traits. *Mol*  
579 *Ecol* **19**, 4061-4076, doi:10.1111/j.1365-294X.2010.04801.x (2010).
- 580 39 Drummond, A. J., Suchard, M. A., Xie, D. & Rambaut, A. Bayesian phylogenetics  
581 with BEAUti and the BEAST 1.7. *Mol Biol Evol* **29**, 1969-1973,  
582 doi:10.1093/molbev/mss075 (2012).
- 583 40 Bell, M. A., Baumgartner, J. V. & Olson, E. C. Patterns of temporal change in  
584 single morphological characters of a Miocene stickleback fish. *Paleobiology* **11**,  
585 258-271 (1985).
- 586 41 Miller, C. T. *et al.* Modular skeletal evolution in sticklebacks is controlled by  
587 additive and clustered quantitative trait loci. *Genetics* **197**, 405-420,  
588 doi:10.1534/genetics.114.162420 (2014).
- 589 42 Barrett, R. D., Rogers, S. M. & Schluter, D. Natural selection on a major armor  
590 gene in threespine stickleback. *Science* **322**, 255-257,  
591 doi:10.1126/science.1159978 (2008).
- 592 43 McKinnon, J. S. & Rundle, H. D. Speciation in nature: the threespine stickleback  
593 model systems. *Trends in Ecology and Evolution* **17**, 480-488 (2002).
- 594 44 Roesti, M., Kueng, B., Moser, D. & Berner, D. The genomics of ecological  
595 vicariance in threespine stickleback fish. *Nature Communications* **6**, 8767,  
596 doi:10.1038/ncomms9767 (2015).
- 597 45 Deagle, B. E. *et al.* Population genomics of parallel phenotypic evolution in  
598 stickleback across stream-lake ecological transitions. *Proceedings of the Royal*  
599 *Society B: Biological Sciences* **279**, 1277-1286, doi:10.1098/rspb.2011.1552  
600 (2012).
- 601 46 Samuk, K. *et al.* Gene flow and selection interact to promote adaptive divergence  
602 in regions of low recombination. *Molecular Ecology*, doi:10.1111/mec.14226  
603 (2017).
- 604 47 Roesti, M., Moser, D. & Berner, D. Recombination in the threespine stickleback  
605 genome - Patterns and consequences. *Molecular Ecology* **22**, 3014-3027,  
606 doi:10.1111/mec.12322 (2013).
- 607 48 Aeschbacher, S., *et al.* Population-genomic inference of the strength and timing  
608 of selection against gene flow. *Proceedings of the National Academy of Sciences*  
609 *USA* **114**, 7061-7066, doi:10.1073/pnas.1616755114 (2017).
- 610 49 Glazer, A. M., *et al.* Genome assembly improvement and mapping of  
611 convergently evolved skeletal traits in sticklebacks with genotyping-by-  
612 sequencing. *G3-Genes Genomes Genetics* **5**, 1463-1472,  
613 doi:10.1534/g3.115.017905 (2015).
- 614 50 Guerrero, R. F., Rousset, F. & Kirkpatrick, M. Coalescent patterns for  
615 chromosomal inversions in divergent populations. *Philosophical Transactions of*  
616 *the Royal Society B: Biological Sciences* **367**, 430-438,  
617 doi:10.1098/rstb.2011.0246 (2012).

- 618 51 Hendry, A. P., Taylor, E. B. & McPhail, J. D. Adaptive divergence and the  
619 balance between selection and gene flow: lake and stream stickleback in the  
620 Misty system. *Evolution* **56**, 1199-1216, doi:10.1554/0014-  
621 3820(2002)056[1199:ADATBB]2.0.CO;2 (2002).
- 622 52 Lescak, E. A. *et al.* Evolution of stickleback in 50 years on earthquake-uplifted  
623 islands. *Proceedings of the National Academy of Sciences USA* **112**, E7204-  
624 7212, doi:10.1073/pnas.1512020112 (2015).
- 625 53 Cresko, W. A. *et al.* Parallel genetic basis for repeated evolution of armor loss in  
626 Alaskan threespine stickleback populations. *Proceedings of the National*  
627 *Academy of Sciences USA* **101**, 6050-6055, doi:10.1073/pnas.0308479101  
628 (2004).
- 629 54 Catchen, J. M., *et al.* Stacks: building and genotyping Loci de novo from short-  
630 read sequences. *G3 - Genes Genomes Genetics* **1**, 171-182,  
631 doi:10.1534/g3.111.000240 (2011).
- 632 55 Aronesty, E. ea-utils: Command-line tools for processing biological sequencing  
633 data. (2011).
- 634 56 Baird, N. A. *et al.* Rapid SNP discovery and genetic mapping using sequenced  
635 RAD markers. *Plos One* **3**, 1-7, doi:10.1371/journal.pone.0003376 (2008).
- 636 57 Stephens, M., Smith, N. J. & Donnelly, P. A new statistical method for haplotype  
637 reconstruction from population data. *American Journal of Human Genetics* **68**,  
638 978-989, doi:Doi 10.1086/319501 (2001).
- 639 58 Arnold, B., *et al.* RADseq underestimates diversity and introduces genealogical  
640 biases due to nonrandom haplotype sampling. *Mol Ecol* **22**, 3179-3190,  
641 doi:10.1111/mec.12276 (2013).
- 642 59 Catchen, J., *et al.* Stacks: An analysis tool set for population genomics.  
643 *Molecular Ecology* **22**, 3124-3140, doi:10.1111/mec.12354 (2013).
- 644 60 Li, H. *et al.* The Sequence alignment/map (SAM) format and SAMtools.  
645 *Bioinformatics* **25**, 2078-2079 (2009).
- 646 61 Drummond, A. J. & Rambaut, A. BEAST: Bayesian evolutionary analysis by  
647 sampling trees. *Bmc Evol Biol* **7**, 214, doi:10.1186/1471-2148-7-214 (2007).
- 648 62 Paradis, E., Claude, J. & Strimmer, K. APE: Analyses of phylogenetics and  
649 evolution in R language. *Bioinformatics* **20**, 289-290,  
650 doi:10.1093/bioinformatics/btg412 (2004).
- 651 63 Kingman, J. F. C. The coalescent. *Stochastic Processes and their Applications*  
652 **13**, 235-248, doi:10.1016/0304-4149(82)90011-4 (1982).
- 653 64 Kingman, J. F. C. On the genealogy of large populations. *Journal of Applied*  
654 *Probability* **19**, 27-43 (1982).
- 655 65 Tajima, F. Evolutionary relationship of DNA-sequences in finite populations.  
656 *Genetics* **105**, 437-460 (1983).
- 657 66 R Core Team. R Foundation for Statistical Computing, Vienna, Austria (2016).
- 658 67 Nei, M. *Molecular Evolutionary Genetics*. (Columbia university press, 1987).
- 659 68 Hudson, R. R., Slatkin, M. & Maddison, W. P. Estimation of levels of gene flow  
660 from DNA-sequence data. *Genetics* **132**, 583-589 (1992).

- 661 69 Pfeifer, B., *et al.* PopGenome: An efficient swiss army knife for population  
662 genomic analyses in R. *Molecular Biology and Evolution* **31**, 1929-1936,  
663 doi:10.1093/molbev/msu136 (2014).
- 664 70 Paradis, E. pegas: an R package for population genetics with an integrated-  
665 modular approach. *Bioinformatics* **26**, 419-420,  
666 doi:10.1093/bioinformatics/btp696 (2010).
- 667



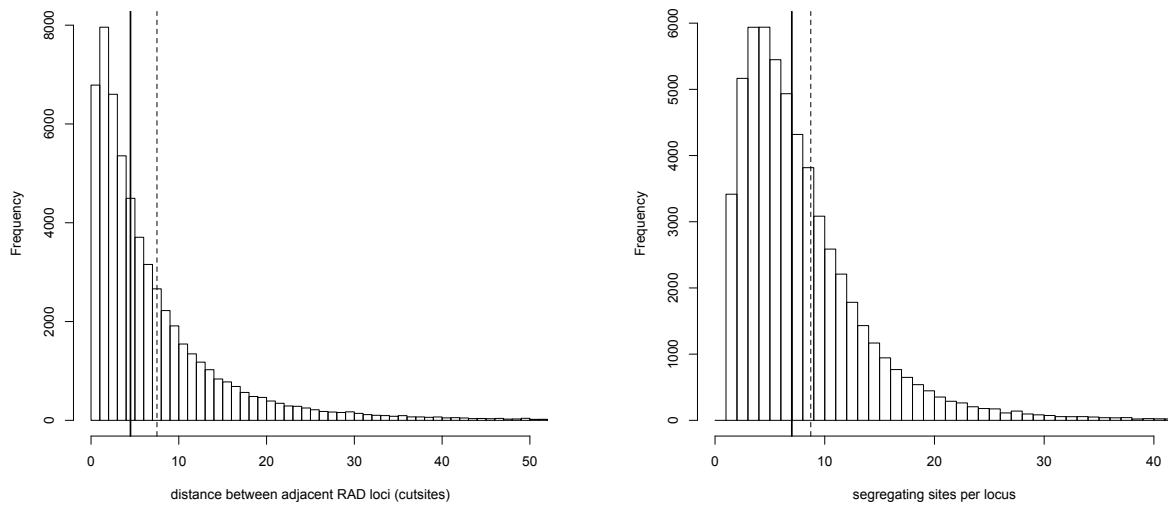

**Supplementary Figure S1. RAD-seq effectively samples genome-wide sequence diversity.** Histograms of the distance between adjacent RAD loci (left: calculated as the distance between the centers of each restriction site) and the number of variable sites per locus show that most RAD loci were within 4 kb of their nearest neighbor and contained  $\geq 7$  variable sites. Means for each metric are shown as dashed vertical lines. Medians are solid lines. Each histogram is truncated to highlight the bulk of the distribution. Maximum values: distance = 455 kb; variable sites = 155.

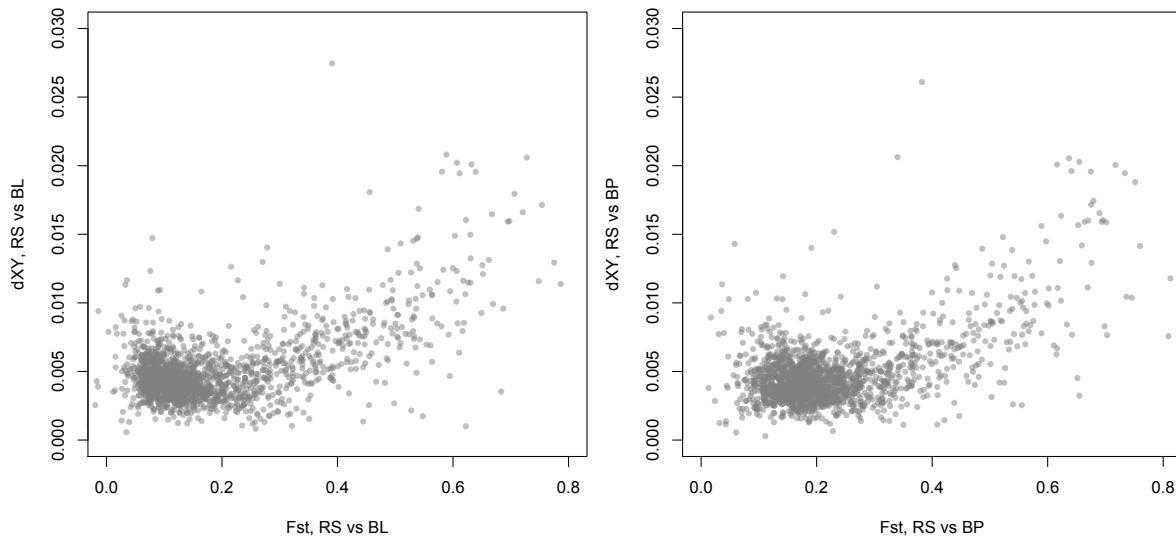

**Supplementary Figure S2. Relative ( $F_{ST}$ ) and absolute ( $d_{XY}$ ) sequence divergence are positively correlated genome-wide in two instances of marine-freshwater divergence.** Points are 250 kb non-overlapping genomic windows. Left panel compares the marine Rabbit Slough population (RS) to the freshwater Boot Lake population (BL) (type-II linear model:  $r^2 = 0.314$ , permuted p-value [reduced major axis] = 0.01). Right panel compares RS to the freshwater Bear Paw Lake population (BL) (type-II linear model:  $r^2 = 0.311$ , permuted p-value [reduced major axis] = 0.01).

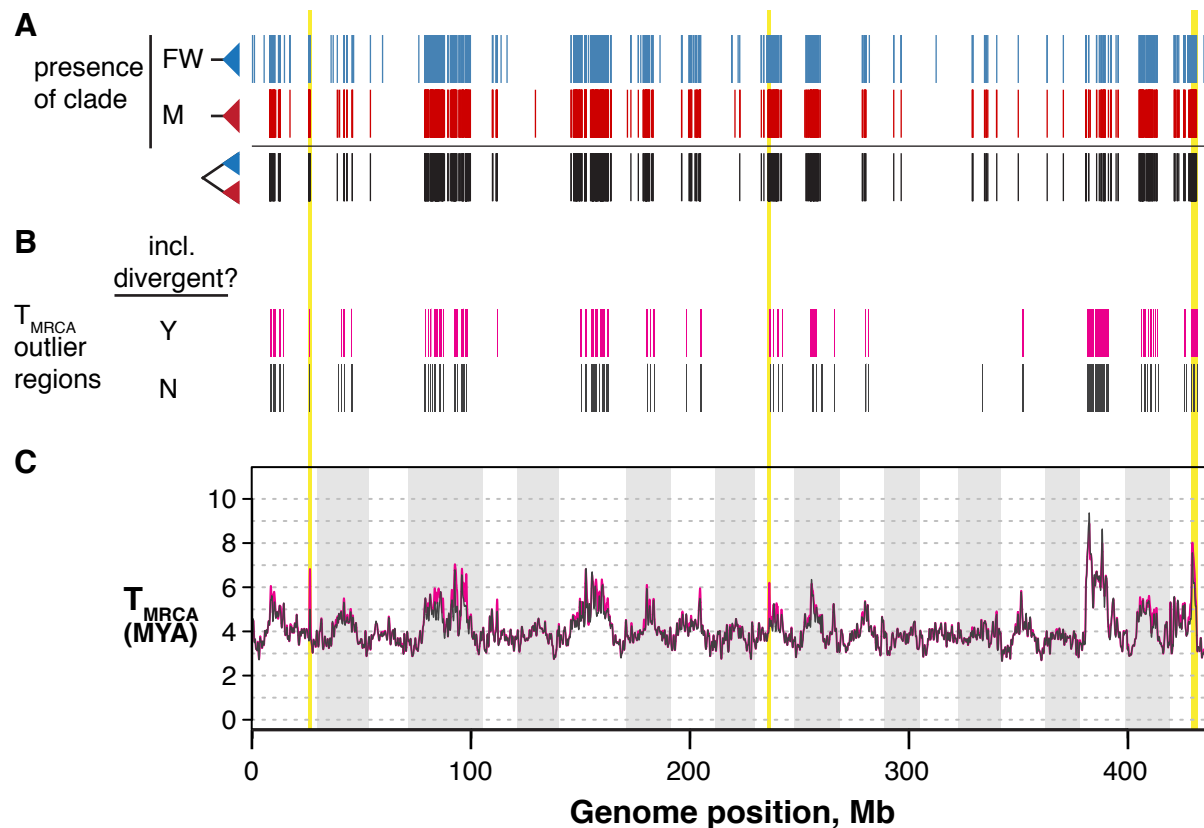

**Supplementary Figure S3.  $T_{MRCA}$  outlier regions remain outliers after removing highly differentiated RAD loci.** Panel A is taken from Fig. 2 and shows the genomic distribution of reciprocally monophyletic (“divergent”; black bars) RAD loci. Panel B shows the distributions of  $T_{MRCA}$  outlier regions (increased  $T_{MRCA}$ ) including all RAD loci (magenta boxes, “Y”). Below are the  $T_{MRCA}$  outlier regions after removing divergent loci and any RAD locus with a marine-freshwater (RS vs. [BL+BP])  $F_{ST} > 0.5$ , which is approximately the top 7% of the  $F_{ST}$  distribution. Panel C: Genome scans of  $T_{MRCA}$  using all RAD loci (magenta) and excluding marine-freshwater outliers (gray).

**Supplementary table 1.** Sequencing summary for threespine stickleback samples

| Sample  | population    | raw reads | filtered reads | merged pairs | mean coverage per locus |
|---------|---------------|-----------|----------------|--------------|-------------------------|
| 1827.05 | Rabbit Slough | 10167407  | 10031967       | 7269377      | 12X                     |
| 1827.06 | Rabbit Slough | 10265078  | 10172621       | 7591801      | 13X                     |
| 1827.07 | Rabbit Slough | 9175983   | 9040625        | 6771332      | 11X                     |
| 1827.08 | Rabbit Slough | 7896938   | 7814081        | 5879351      | 10X                     |
| 1827.09 | Rabbit Slough | 8773502   | 8668261        | 6405777      | 11X                     |
| 2827.01 | Boot Lake     | 8917575   | 8810382        | 6373001      | 11X                     |
| 2827.07 | Boot Lake     | 10064876  | 9917732        | 7255989      | 13X                     |
| 2827.13 | Boot Lake     | 9099831   | 9002717        | 6528704      | 12X                     |
| 2827.19 | Boot Lake     | 11021084  | 10792092       | 7911026      | 14X                     |
| 2827.25 | Boot Lake     | 9920574   | 9814758        | 7287485      | 13X                     |
| 1902.02 | Bear Paw Lake | 4780489   | 4365505        | 2942926      | 5X                      |
| 1902.03 | Bear Paw Lake | 5073434   | 4643909        | 3192582      | 5X                      |
| 1902.04 | Bear Paw Lake | 4902931   | 4600877        | 3138791      | 6X                      |
| 1902.06 | Bear Paw Lake | 4501906   | 4339253        | 2983345      | 5X                      |

**Supplementary table 2.** Genome assembly statistics for *Pungitius pungitius*.

|                            | contig (scaffold) |
|----------------------------|-------------------|
| n                          | 393,037 (391,396) |
| Max length (bp)            | 165,088 (182,644) |
| N50 (bp)                   | 9,202 (9,886)     |
| Average length (bp)        | 1,314 (1,320)     |
| Gaps (%)                   | 0.03              |
| Total assembly length (bp) | 516,674,741       |
